# Supplementary material for: Investigating the differences in calculating global mean surface CO 2 abundance: the impact of analysis methodologies and site selection
Source: Copernicus journal article supplement (doi:10.5194/acp-24-1249-2024), 2024-01-29
Supplement: Supplementary file 1 [file acp-24-1249-2024-supplement.pdf]

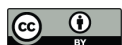

*Supplement of*

## **Investigating the differences in calculating global mean surface CO<sub>2</sub> abundance: the impact of analysis methodologies and site selection**

**Zhendong Wu et al.**

*Correspondence to:* Zhendong Wu ([zhendong.wu@nateko.lu.se](mailto:zhendong.wu@nateko.lu.se)) and Alex Vermeulen ([alex.vermeulen@icos-ri.eu](mailto:alex.vermeulen@icos-ri.eu))

The copyright of individual parts of the supplement might differ from the article licence.

1 **S1. The WDCGG global analysis method**

2 The WDCGG method consists of seven separate steps. The full documentation can be found in Tsutsumi et al.  
3 (2009).

4 **Step 1: Station selection based on traceability to the WMO standard scale**

5 In order to avoid the potential biases that can be introduced by using different concentration scales, WDCGG only  
6 uses data from stations that report results traceable to the most recent CO<sub>2</sub> scale from the GAW Central Calibration  
7 Laboratories (CCL) assigned for that parameter. The current scale is the WMO standard scale WMO-CO<sub>2</sub>-X2019.

8 **Step 2: Integration of parallel data from the same station**

9 The WDCGG method uses continuous (hourly averaged) observations as these better represent the average  
10 concentrations compared to the flask-air samples taking during daytime once per two weeks. For remote stations  
11 where both flask and continuous data exist, NOAA found offsets between continuous and flask based monthly  
12 averages of 0.16-0.35 ppm (Tans et al., 1990), in less remote areas this difference can be expected to be larger.  
13 For selected stations flask data are used for gap filling when continuous data is lacking.

14 **Step 3: Selection of stations suitable for global analysis**

15 All of station data are normalized against the South Pole and averaged for the whole observation period. The  
16 normalized and averaged data points are plotted against latitude, and a curve is fitted by using a nearest-neighbour  
17 local-quadratic regression. The stations with normalized data locate outside the 3 standard deviations of the  
18 latitudinal fitted curve are excluded from the selection. This selection procedure is repeated until all stations in  
19 the selection locating within the 3 standard deviations of the latitudinal fitted curve. This procedure results in 139  
20 stations remaining, which have a reasonable latitudinal scatter range (Fig. 1).

21 **Step 4: Abstraction of a station's average seasonal variation expressed by the Fourier harmonics**

22 The average seasonal variation is obtained from the longest continuous segment of data by using three Fourier  
23 harmonics. Here is loop procedure where the following processes a-d are repeated until neither the long-term trend  
24 nor the average seasonal variation changes: a). de-trend original data, b). apply the harmonics to obtain  
25 seasonality, c). de-seasonality from original data to obtain long-term trend, d) smooth the long-term trend by using  
26 low-pass filter (a cut-off frequency of 0.48 cycle / year). After reaching this condition the average seasonal  
27 variation is determined and subtracted from the full data which leaves us with deseasonalized data that still can  
28 contain gaps.

29 **Step 5: Interpolation of data gaps**

30 The gaps of the deseasonalized data are filled by linear interpolation. Subsequently, the CO<sub>2</sub> time series without  
31 gaps is the sum of the interpolated trend and the average seasonality.

32 **Step 6: Extrapolation for synchronization of data period**

33 Extrapolate the long-term trend to the synchronization period and then add the average seasonal variation to obtain  
34 the synchronized data. This is an optional step that is excluded in this analysis.

### 35 **Step 7: Calculation of the zonal and global mean mole fractions, trends, and growth rates.**

36 Global and hemispheric means, trends and growth rates are calculated by area-weighted averaging the zonal means  
37 over each latitudinal band (30°). The growth rate is determined by taking the first derivative of the long-term  
38 trend.

### 39 **S2. The CTE station network**

40 290 stations are evaluated in the CTE inversion, the observations come from the ObsPack data product (Schuldt  
41 et al., 2022). The measurement methods at the stations include surface-based, shipboard-based, tower-based and  
42 aircraft-based. In this study, we only focus on data derived from the first three measurement types (i.e. aircraft-  
43 based measurements are excluded), and in total 230 out of 290 stations are selected (Fig. 1). For the stations that  
44 have both surface-based and tower-based measurements, we used the tower-based measurements for analysis. For  
45 the stations that have tower-based measurements, we selected the highest measurement.

### 46 **S3. Calculation of atmospheric CO<sub>2</sub> mass**

47 CTE simulates 3D CO<sub>2</sub> mole fraction with 25 levels in the vertical direction. The CO<sub>2</sub> mass at each level of the  
48 atmosphere can be calculated as a function of air mass and CO<sub>2</sub> concentration by weight.

$$49 \quad m_{CO_2} = Cw_{CO_2} * m_{air} \quad (S1)$$

50 where  $m_{CO_2}$  is the mass of the CO<sub>2</sub>, kg.  $Cw_{CO_2}$  is the CO<sub>2</sub> concentration by weight, w %.  $m_{air}$  is the mass of the  
51 air, kg. CO<sub>2</sub> concentration by weight is obtained by the formula below:

$$52 \quad Cw_{CO_2} = Cv_{CO_2} * \frac{M_{CO_2}}{M_{air}} \quad (S2)$$

53 where  $Cv_{CO_2}$  is the mole fraction of CO<sub>2</sub> in air, mol / mol. According to the ideal gas assumption, equal volume  
54 of gases at same temperature and pressure contains equal number of moles regardless of chemical nature of gases,  
55 i.e. the CO<sub>2</sub> concentration by mole equals the CO<sub>2</sub> concentration by volume.  $M_{CO_2}$  is the CO<sub>2</sub> molar mass  
56 (44.009 g/mol).  $M_{air}$  is the average molar mass of dry air (28.9647 g / mol).

57 Pressure is the force applied perpendicular to the surface of an object, therefore, air pressure can be expressed by:

$$58 \quad p_{air} = \frac{F_{air}}{S} \quad (S3)$$

59 where  $p_{air}$  is the pressure of air, Pa or N / m<sup>2</sup>. In this case,  $p_{air}$  is the difference of air pressure between adjacent  
60 level boundaries, e.g. air pressure at level 1 is  $p_1 - p_2$ .  $F_{air}$  is the magnitude of the normal force of air or gravity  
61 of air, N or kg m / s<sup>2</sup>. The gravity of air at each level can be estimated by:

$$62 \quad F_{air} = m_{air} * g \quad (S4)$$

63 where  $g$  is the gravitational field strength, about 9.81 m / s<sup>2</sup> or N / kg.

64  $S$  is the area of the surface, m<sup>2</sup>. Here  $S$  is the area of grid cell at each level, increasing with geopotential height  
65 (gph). It is calculated as a function of latitude and longitude on earth's surface, radius of the earth ( $R$ ), and  $gph$ .

$$66 \quad S = 2 * \pi * (R + gph)^2 * |\sin(lat1) - \sin(lat2)| * \frac{|lon1 - lon2|}{360} \quad (S5)$$

67 Where,  $lat1$ ,  $lat2$ ,  $lon1$  and  $lon2$  are the boundary of grid cell.  $R = 6378.1370$  km, here we use the equatorial  
68 radius which is the distance from earth's center to the equator.

69 Hence the mass of the air in Eq. 1 can be estimated by:

$$70 \quad m_{air} = \frac{p_{air} * S}{g} \quad (S6)$$

#### 71 **S4. File list**

72 All code necessary to calculate the global mean surface CO<sub>2</sub> mole fraction and Atmospheric CO<sub>2</sub> mass is freely  
73 available on ICOS Carbon Portal as a zipped archive (GAW\_code.zip) [<https://doi.org/10.18160/Q788-9081>],  
74 when unzipped, the code include:

- 75 • fit\_filter\_gfit.ipynb

76 Apply the GFIT method to GAW observations (139 stations), CTE observations (230 stations), CTE  
77 model output at stations (230 stations) and CTE model output (full global)

- 78 • cal\_zonal\_global\_co2\_gaw\_gfit.ipynb

79 Calculate global co2 mole fraction average and its growth rate, and estimate their uncertainty, using  
80 output from GAW(GFIT)

- 81 • cal\_zonal\_global\_co2\_gaw\_wdceg.ipynb

82 Calculate global co2 mole fraction average and its growth rate, and estimate their uncertainty, using  
83 output from GAW(WDCGG)

- 84 • cal\_zonal\_global\_co2\_ctracker\_obs.ipynb

85 Calculate global co2 mole fraction average and its growth rate, and estimate their uncertainty, using  
86 output from CTE\_obs(GFIT)

- 87 • cal\_zonal\_global\_co2\_ctracker\_model\_sample.ipynb

88 Calculate global co2 mole fraction average and its growth rate, and estimate their uncertainty, using  
89 output from CTE\_output(GFIT)

- 90 • cal\_zonal\_global\_co2\_ctracker\_model\_global.ipynb

91 Calculate global co2 mole fraction average and its growth rate, and estimate their uncertainty, using  
92 output from CTE\_global(GFIT)

- 93 • cal\_co2mass\_co2ppm\_cte\_global.ipynb

94 Calculate global co2 mole fraction and global atmospheric co2 mass, using the 3D co2 output from CTE  
95 model

- 96 • compare\_co2\_co2rate.ipynb

97 Statistically compare the co2 mole fraction and its growth rate among different data sources and analysis  
98 methods

- 99 • plot\_results.ipynb

100 The script is used to analyze and plot the results in the paper.

101 In order to run the jupyter notebooks, it needs to download the data (GAW\_data.zip)  
102 [<https://doi.org/10.18160/Q788-9081>] and change the data path in jupyter notebooks to where the data is unzipped.

103 The key results with CSV format are accessible on ICOS Carbon Portal as a zipped archive (GAW\_results.zip)  
104 [<https://doi.org/10.18160/Q788-9081>], when unzipped, the data include:

- 105 • Global monthly and annual surface CO<sub>2</sub> mole fraction and its growth rate for 1980-2020 derived from  
106 the GAW observations by using the GFIT method, i.e. GAW (GFIT).

107 Global mean :

108 df\_co2\_annual\_global\_NH\_SH\_gaw\_GFIT.csv

109 df\_co2\_monthly\_global\_NH\_SH\_gaw\_GFIT.csv

110 df\_co2rate\_annual\_global\_NH\_SH\_gaw\_GFIT.csv

111 df\_co2rate\_monthly\_global\_NH\_SH\_gaw\_GFIT.csv

112 Their uncertainty basing on bootstrap method:

113 bootstats\_co2\_annual\_global\_gaw\_GFIT.csv

114 bootstats\_co2\_monthly\_global\_gaw\_GFIT.csv

115 bootstats\_co2rate\_annual\_global\_gaw\_GFIT.csv

116 bootstats\_co2rate\_monthly\_global\_gaw\_GFIT.csv

- 117 • Global monthly and annual surface CO<sub>2</sub> mole fraction and its growth rate for 1980-2020 derived from  
118 the GAW observations by using the WDCGG method without extrapolation, i.e. GAW (WDCGG).

119 Global mean:

120 df\_co2\_annual\_global\_NH\_SH\_gaw\_wdcgg.csv

121 df\_co2\_monthly\_global\_NH\_SH\_gaw\_wdcgg.csv

122 df\_co2rate\_annual\_global\_NH\_SH\_gaw\_wdcgg.csv

123 df\_co2rate\_monthly\_global\_NH\_SH\_gaw\_wdcgg.csv

124 Their uncertainty basing on bootstrap method:

125 bootstats\_co2\_annual\_global\_gaw\_wdcgg.csv

126 bootstats\_co2\_monthly\_global\_gaw\_wdcgg.csv

127 bootstats\_co2rate\_annual\_global\_gaw\_wdcgg.csv

128 bootstats\_co2rate\_monthly\_global\_gaw\_wdcgg.csv

- 129 • Global monthly and annual surface CO<sub>2</sub> mole fraction and its growth rate for 1980-2020 derived from  
130 the observations at the CTE 230 stations by using GFIT method, i.e. CTE\_obs (GFIT).

131 Global mean:

132 co2obs\_co2\_annual\_global\_NH\_SH\_ct2021\_obs.csv

133 co2obs\_co2\_monthly\_global\_NH\_SH\_ct2021\_obs.csv

134 co2obs\_co2rate\_annual\_global\_NH\_SH\_ct2021\_obs.csv

135 co2obs\_co2rate\_monthly\_global\_NH\_SH\_ct2021\_obs.csv

136 Their uncertainty basing on bootstrap method:

137 bootstats\_co2\_annual\_global\_cal\_ct2021\_obs.csv

138 bootstats\_co2\_monthly\_global\_cal\_ct2021\_obs.csv

139 bootstats\_co2rate\_annual\_global\_cal\_ct2021\_obs.csv

140 bootstats\_co2rate\_monthly\_global\_cal\_ct2021\_obs.csv

- 141 • Global monthly and annual surface CO<sub>2</sub> mole fraction and its growth rate for 2001-2020 derived from  
142 the CTE model output sampling at the CTE 230 stations by using GFIT method, i.e. CTE\_output (GFIT).

143 Global mean:

144 co2model\_co2\_annual\_global\_NH\_SH\_ct2021\_modelsample.csv

145 co2model\_co2\_monthly\_global\_NH\_SH\_ct2021\_modelsample.csv

146 co2model\_co2rate\_annual\_global\_NH\_SH\_ct2021\_modelsample.csv

147           co2model\_co2rate\_monthly\_global\_NH\_SH\_ct2021\_modelsample.csv  
148    Their uncertainty basing on bootstrap method:  
149           bootstats\_co2\_annual\_global\_cal\_ct2021\_modelsample.csv  
150           bootstats\_co2\_monthly\_global\_cal\_ct2021\_modelsample.csv  
151           bootstats\_co2rate\_annual\_global\_cal\_ct2021\_modelsample.csv  
152           bootstats\_co2rate\_monthly\_global\_cal\_ct2021\_modelsample.csv  
153    •   Global monthly and annual surface CO<sub>2</sub> mole fraction and its growth rate for 2001-2020 derived from  
154    the CTE model output covers full global (averaged over the first three levels, 0 to 0.35 km Alt.) by using  
155    GFIT method, i.e. CTE\_global (GFIT)  
156           co2\_annual\_global\_cte2021(level1-3)\_GFIT.csv  
157           co2\_monthly\_global\_cte2021(level1-3)\_GFIT.csv  
158           co2rate\_annual\_global\_cte2021(level1-3)\_GFIT.csv  
159           co2rate\_monthly\_global\_cte2021(level1-3)\_GFIT.csv  
160    •   Global monthly and annual surface CO<sub>2</sub> mole fraction for 2001-2020 derived from the CTE model output  
161    covers full global with different heights (i.e. level1-3 and level1-25).  
162           cte2021(lv1-3)\_co2\_2000\_2020\_annual.csv  
163           cte2021(lv1-3)\_co2\_2000\_2020\_monthly.csv  
164           cte2021(lv1-25)\_co2\_2000\_2020\_annual.csv  
165           cte2021(lv1-25)\_co2\_2000\_2020\_monthly.csv  
166    •   Global monthly and annual atmospheric CO<sub>2</sub> mass (up to ~200 km) for 2000-2020 derived from the CTE  
167    model output by using the method described in S3.  
168           cte2021\_co2mass\_2000\_2020\_monthly.csv  
169           cte2021\_co2mass\_2000\_2020\_annual.csv  
170  
171  
172

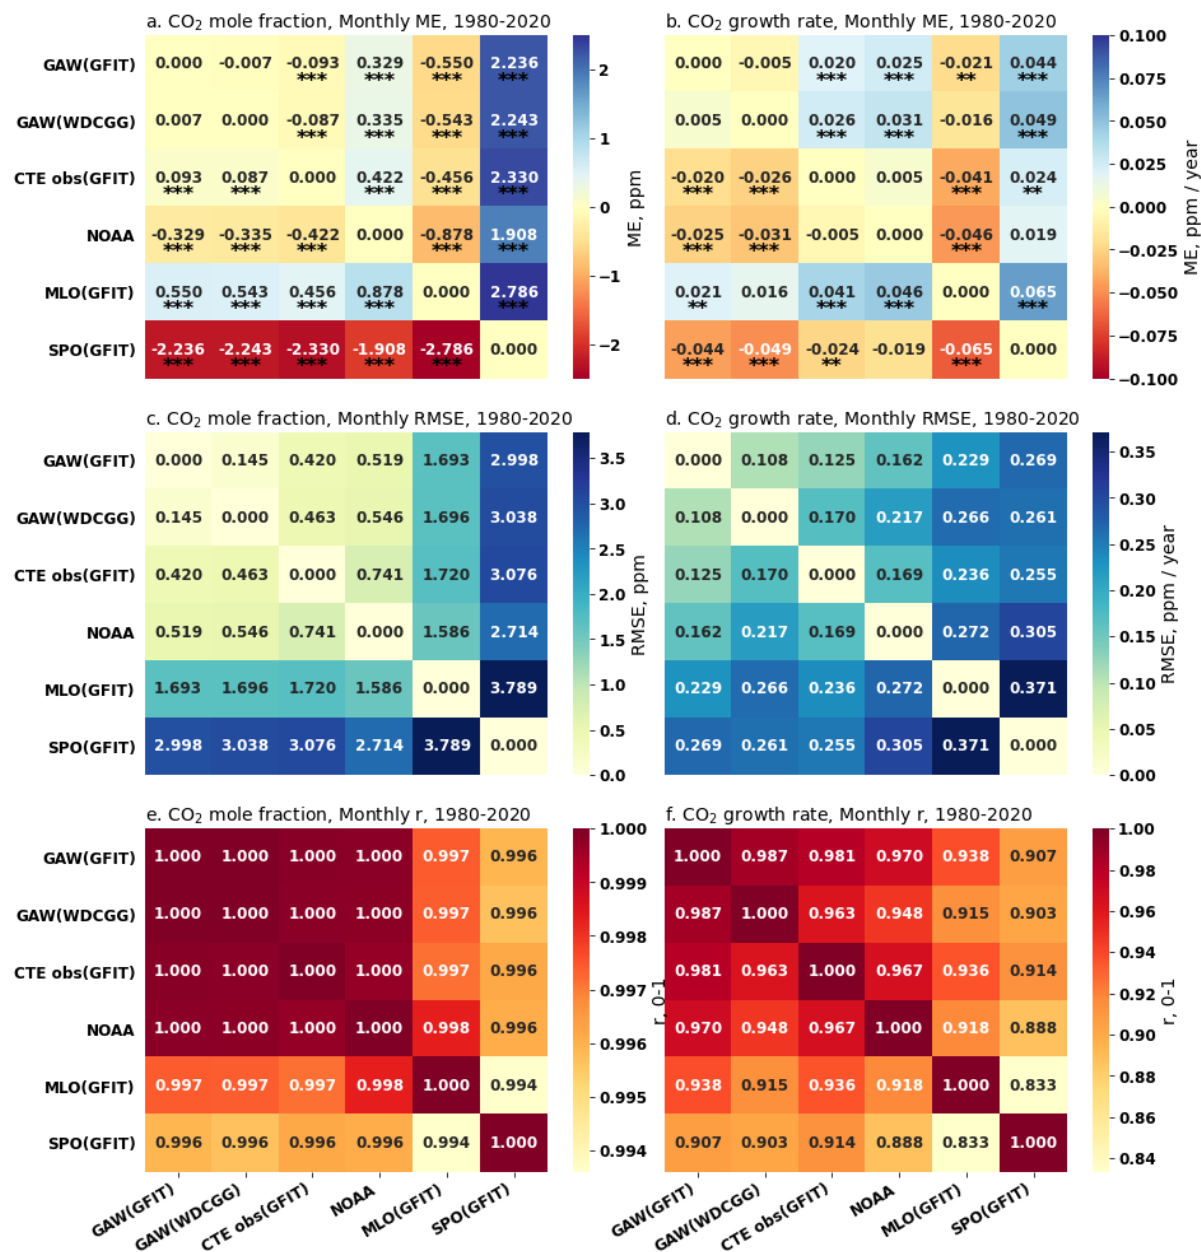

173  
 174  
 175  
 176  
 177  
 178  
 179  
 180

Figure S1. Pair-wise statistical metrics assess the agreement of monthly global and local CO<sub>2</sub> mole fraction (ppm) and its G<sub>ATM</sub> (ppm yr<sup>-1</sup>) across various networks and methodologies (see Table 1 and Fig. 4) for the period 1980-2020. Panel (a) presents the Mean Error (ME) quantifying the difference for each pair, focusing on CO<sub>2</sub> mole fraction, while panel (b) does the same for G<sub>ATM</sub>. The significance levels of paired t-test for ME are indicated as follows: \* p<0.1, \*\* p<0.05, \*\*\* p<0.01. Panel (c) and (d) present the Root Mean Squared Error (RMSE) for CO<sub>2</sub> mole fraction and G<sub>ATM</sub>, respectively. Panel (e) and (f) present the Pearson Correlation Coefficient (r) for CO<sub>2</sub> mole fraction and G<sub>ATM</sub>, respectively.

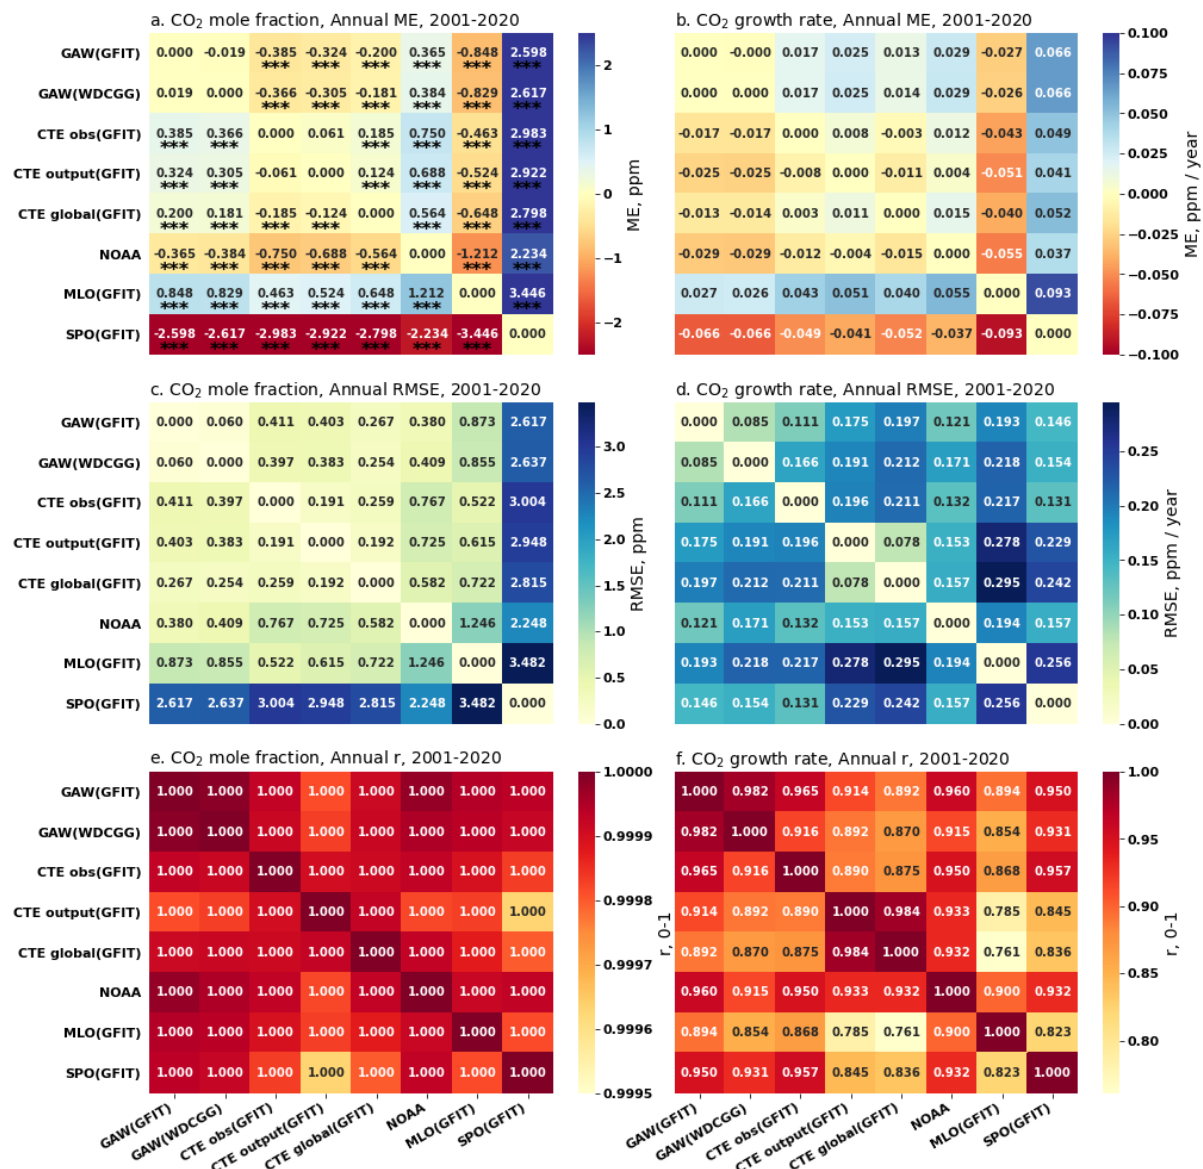

181

182 **Figure S2. Pair-wise statistical metrics assess the agreement of annual global and local CO<sub>2</sub> mole fraction**  
 183 **(ppm) and its  $G_{ATM}$  (ppm yr<sup>-1</sup>) across various networks and methodologies (see Table 1 and Fig. 4) for the**  
 184 **period 2001-2020. Panel (a) presents the Mean Error (ME) quantifying the difference for each pair,**  
 185 **focusing on CO<sub>2</sub> mole fraction, while panel (b) does the same for  $G_{ATM}$ . The significance levels of paired t-**  
 186 **test for ME are indicated as follows: \* p<0.1, \*\* p<0.05, \*\*\* p<0.01. Panel (c) and (d) present the Root**  
 187 **Mean Squared Error (RMSE) for CO<sub>2</sub> mole fraction and  $G_{ATM}$ , respectively. Panel (e) and (f) present the**  
 188 **Pearson Correlation Coefficient (r) for CO<sub>2</sub> mole fraction and  $G_{ATM}$ , respectively.**

189

190

191



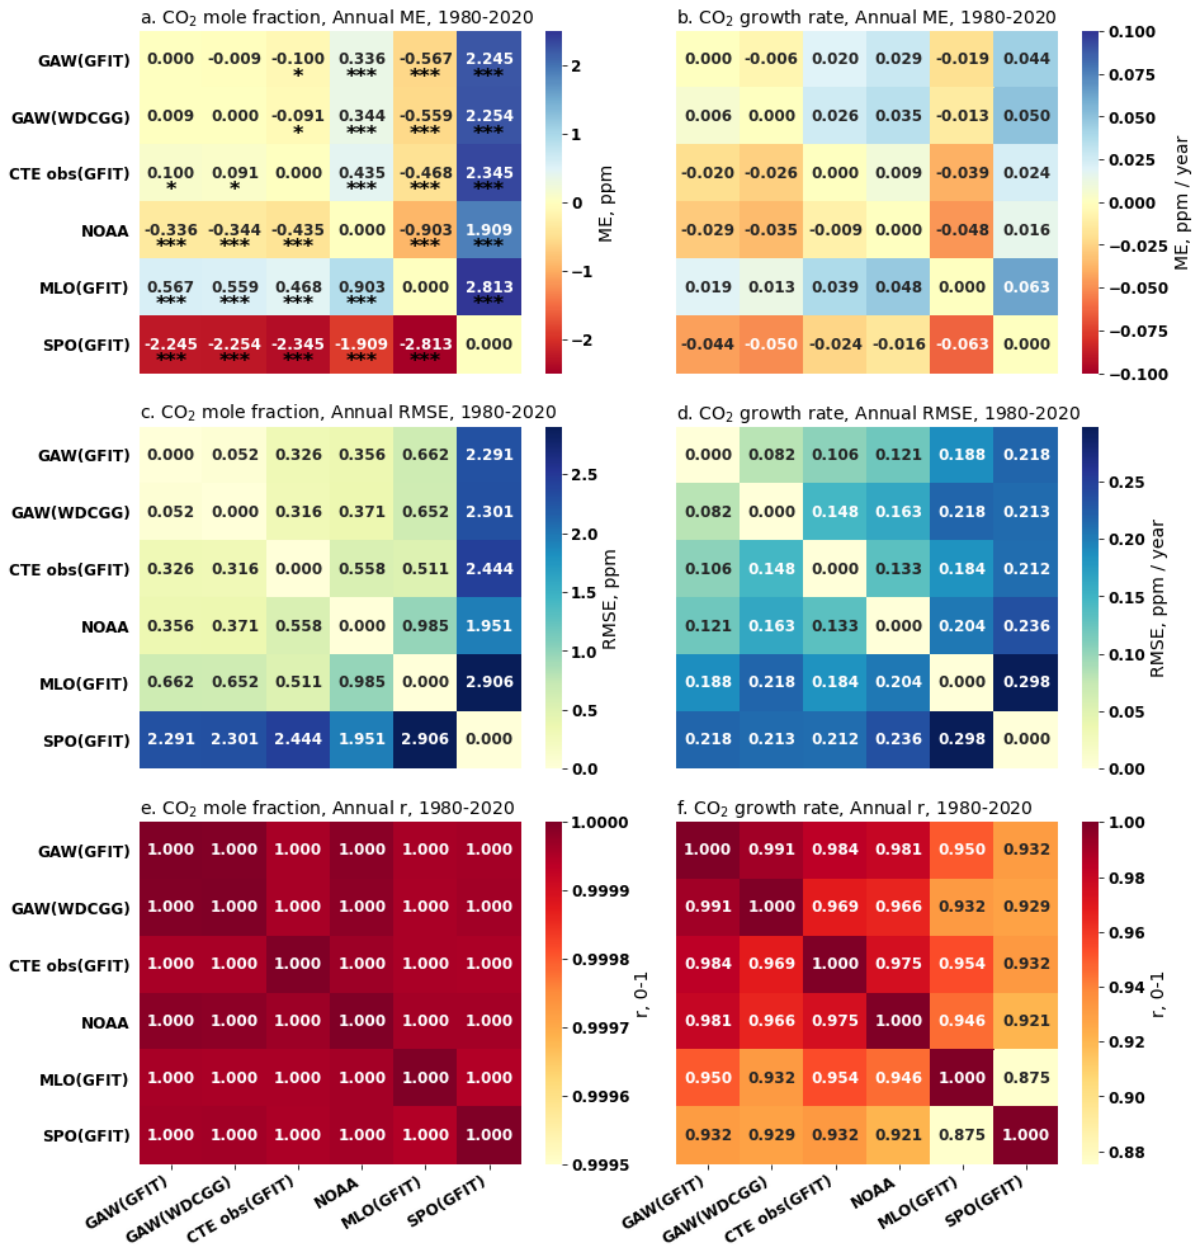

192

193 **Figure S3. Pair-wise statistical metrics assess the agreement of annual global and local CO<sub>2</sub> mole fraction**  
 194 **(ppm) and its G<sub>ATM</sub> (ppm yr<sup>-1</sup>) across various networks and methodologies (see Table 1 and Fig. 4) for the**  
 195 **period 1980-2020. Panel (a) presents the Mean Error (ME) quantifying the difference for each pair,**  
 196 **focusing on CO<sub>2</sub> mole fraction, while panel (b) does the same for G<sub>ATM</sub>. The significance levels of paired t-**  
 197 **test for ME are indicated as follows: \* p<0.1, \*\* p<0.05, \*\*\* p<0.01. Panel (c) and (d) present the Root**  
 198 **Mean Squared Error (RMSE) for CO<sub>2</sub> mole fraction and G<sub>ATM</sub>, respectively. Panel (e) and (f) present the**  
 199 **Pearson Correlation Coefficient (r) for CO<sub>2</sub> mole fraction and G<sub>ATM</sub>, respectively.**

200

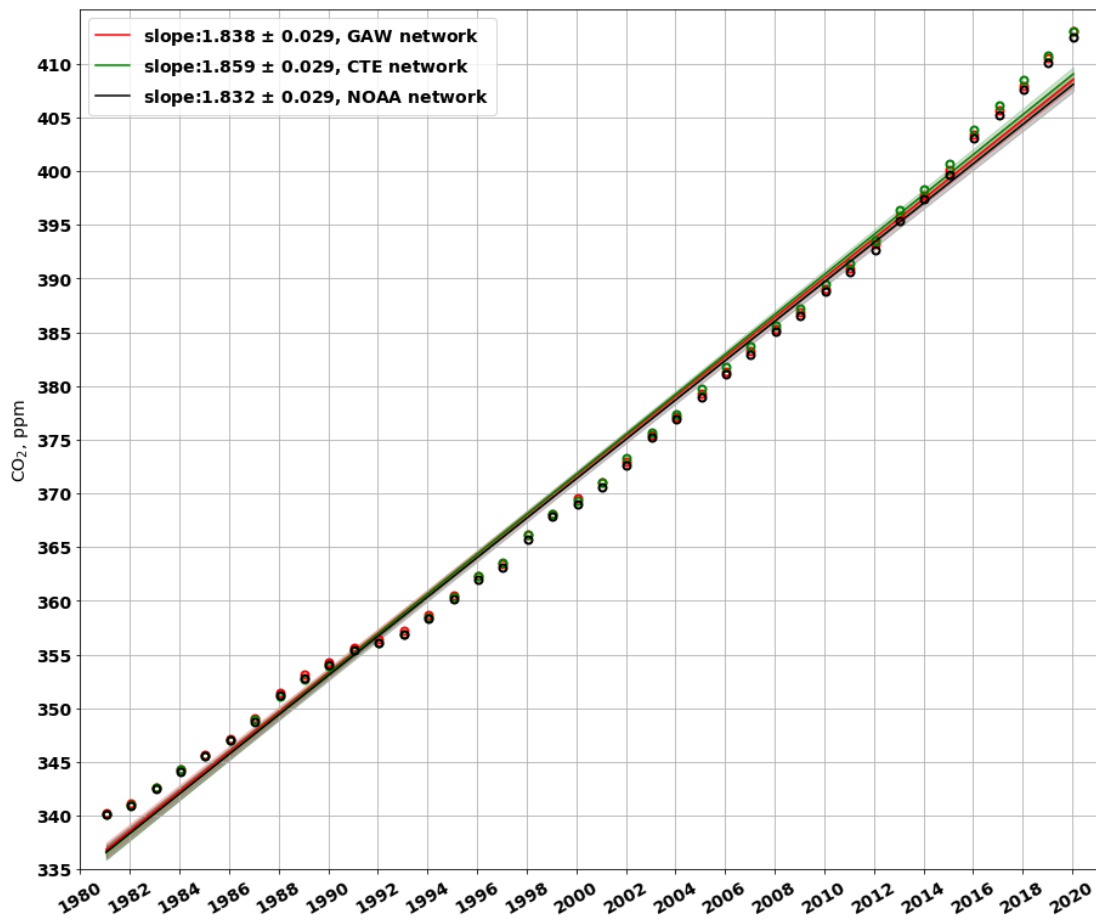

201

202 **Figure S4.** shows the trends of global CO<sub>2</sub> mole fraction for the GAW network (red line), the CTE network  
 203 (green line) and the NOAA network (black line) during the whole period 1980-2020. The cycles show the  
 204 annual CO<sub>2</sub> mole fraction, respectively.

205

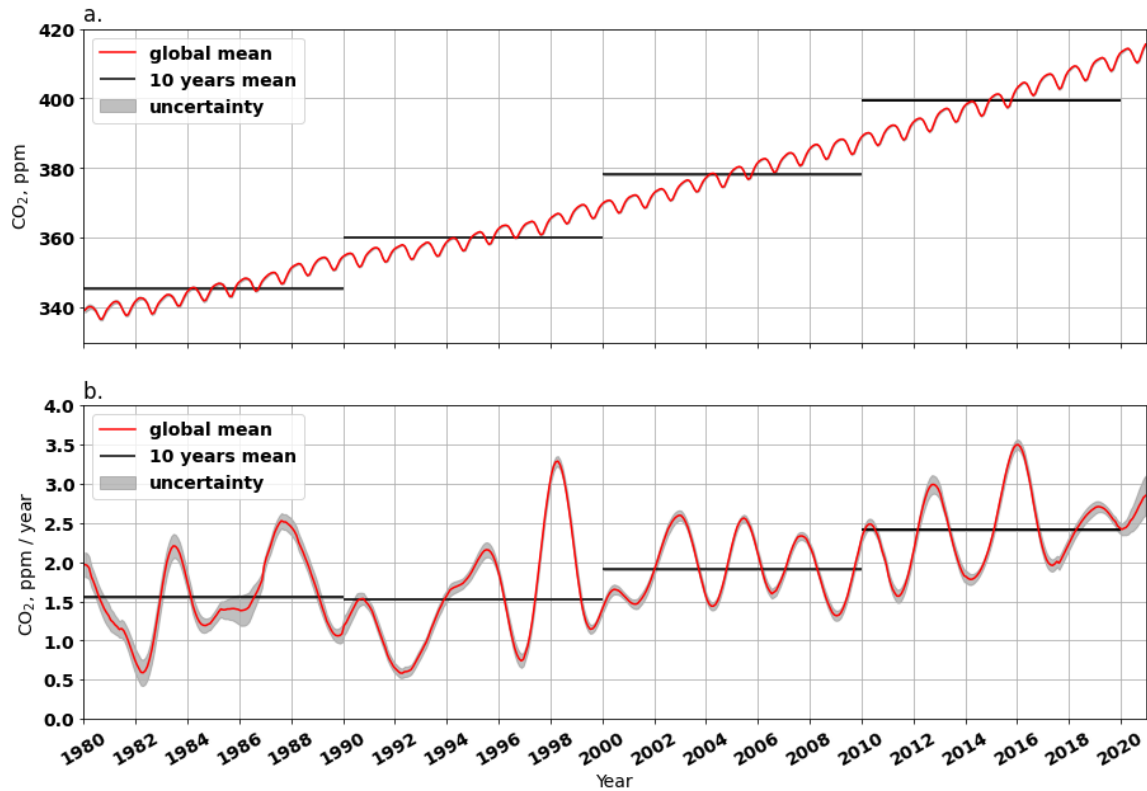

206

207 **Figure S5. Globally averaged CO<sub>2</sub> mole fraction (a) and its G<sub>ATM</sub> (b) from 1980 to 2020. In panel (a), the**  
 208 **red line shows the mean CO<sub>2</sub> mole fraction, black lines show the mean CO<sub>2</sub> mole fraction over 10 years, the**  
 209 **grey area shows the uncertainty derived from the 200 bootstrap networks. Similarly, panel (b) shows the**  
 210 **G<sub>ATM</sub> instead of the mole fraction. The CO<sub>2</sub> and its G<sub>ATM</sub> results are derived from the GAW observations**  
 211 **from 139 stations by using GFIT method.**  
 212

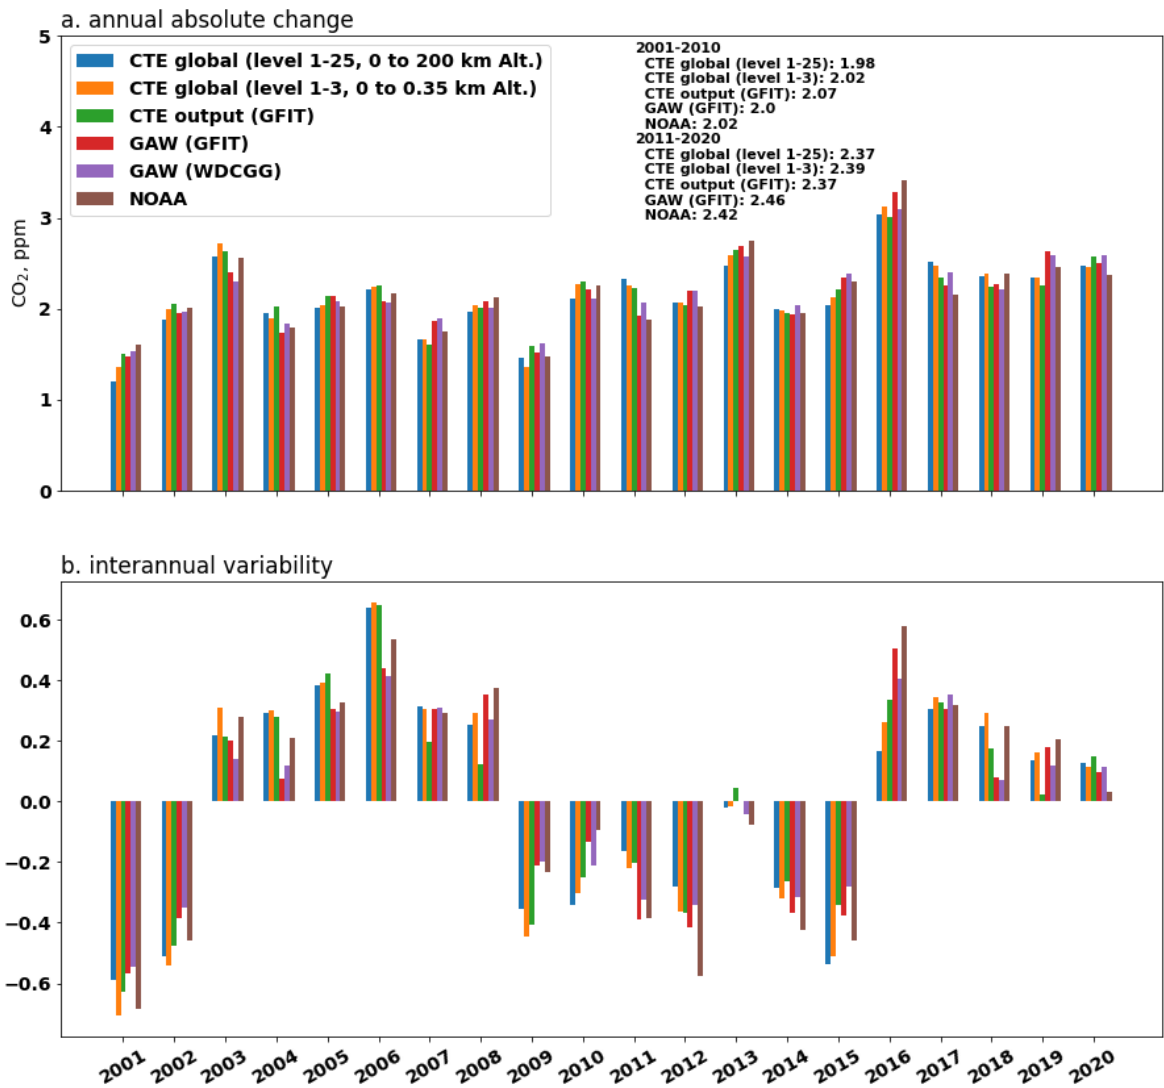

213

214 **Figure S6. Annual absolute change and interannual variability of global CO<sub>2</sub> mole fraction derived from**  
 215 **different data (CTE model, GAW observation and NOAA observation) and analysis methods (GFIT**  
 216 **method, WDCGG method and NOAA method) for 2000-2020. Panel (a) shows the annual absolute change**  
 217 **which is the difference between annual mean. Averages over 2001-2010 and 2011-2020 are also shown. Panel**  
 218 **(b) shows the IAV which is calculated as the anomaly departure from a quadratic trend.**

219

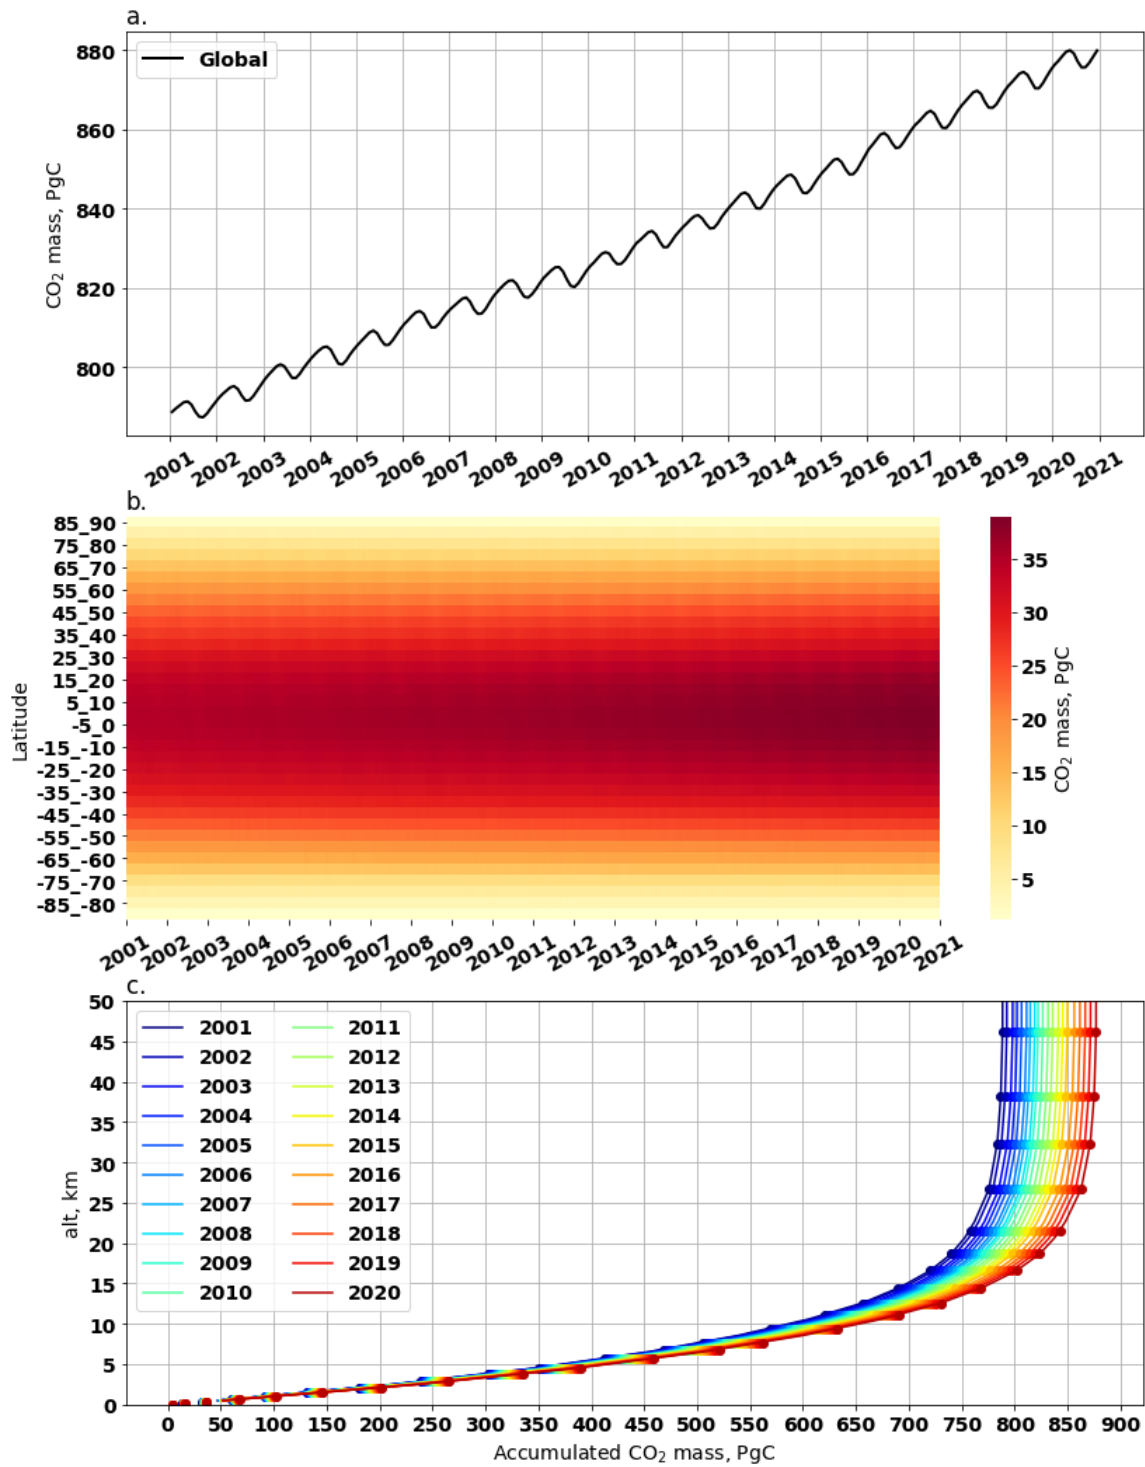

220

221 **Figure S7. Atmospheric CO<sub>2</sub> mass derived from CTE output. Panel (a) shows the global monthly CO<sub>2</sub> mass**  
 222 **in atmosphere (from surface up to 200 km altitude). Panel (b) shows the zonal (5°) average of monthly CO<sub>2</sub>**  
 223 **mass. Panel (c) shows accumulated CO<sub>2</sub> mass with altitudes from 2001 to 2020, the dots mark CTE vertical**  
 224 **level altitudes and lines are the linear interpolation between the altitudes.**

225

226

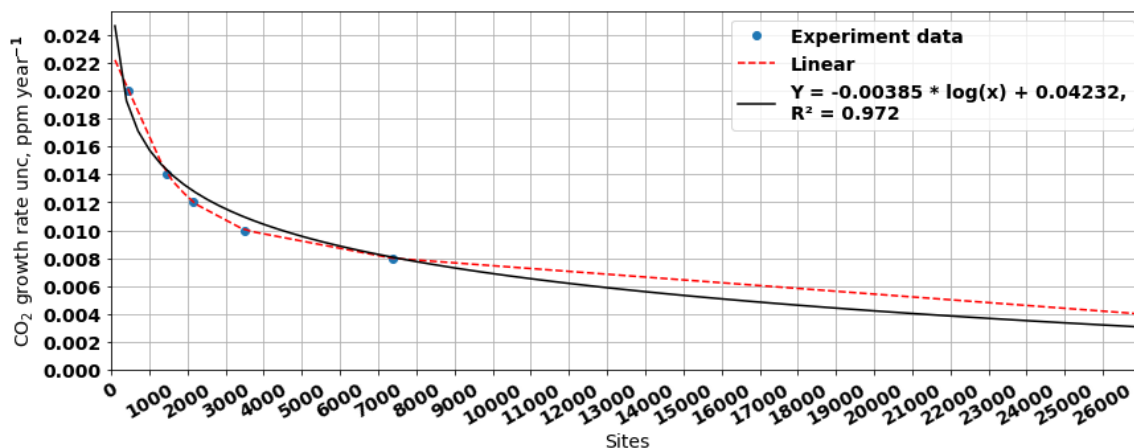

227  
 228 **Figure S8.** The relationship between the uncertainty of the global CO<sub>2</sub> growth rate and the number of  
 229 observation sites. The relationship is estimated using CTE\_global (all global grids excluding ocean grids)  
 230 with different resolutions (1x1, 2x2, 3x3, 4x4, 5x5, and 10x10 degrees) to estimate the uncertainty of the  
 231 global CO<sub>2</sub> growth rate. The bootstrap method mentioned in the main text is used to estimate the  
 232 uncertainty, and the results are represented as blue dots. The red dashed line shows the linear interpolation  
 233 between the experimental results, while the black line shows an exponential curve fitting.  
 234

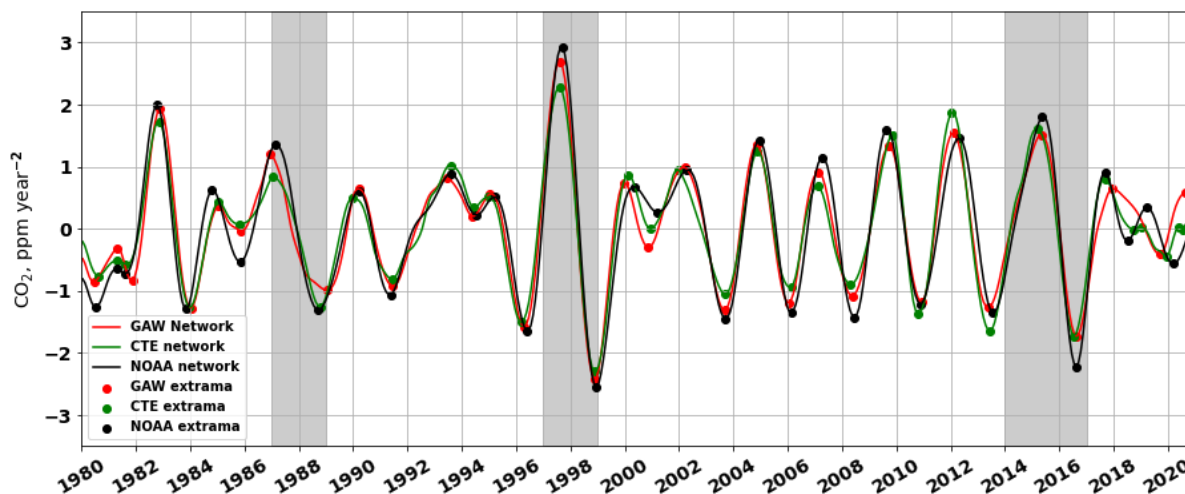

235  
 236 **Figure S9.** presents the smoothed trend of CO<sub>2</sub> growth rate for each month during 1980-2020. The trends  
 237 (depicted in Figure 6b) are smoothed by using a Gaussian filter (with sigma=1.96). The dots represent the  
 238 local extrema, which aid in identifying the start of CO<sub>2</sub> growth rate increase/decrease.

239

| GAW (WDCGG+) vs GAW (WDCGG), 1984-2020 |                 |                  |                 |                  |
|----------------------------------------|-----------------|------------------|-----------------|------------------|
| Statistic                              | Annual          |                  | Monthly         |                  |
|                                        | CO <sub>2</sub> | G <sub>ATM</sub> | CO <sub>2</sub> | G <sub>ATM</sub> |
| r                                      | 0.999           | 0.994            | 0.999           | 0.992            |
| RMSE                                   | 0.130           | 0.062            | 0.180           | 0.076            |
| MAE                                    | 0.115           | 0.037            | 0.151           | 0.042            |
| ME                                     | 0.096***        | -0.011           | 0.096***        | -0.011***        |

240 Note paired t-test significance level for ME: \* p<0.1, \*\* p<0.05, \*\*\* p<0.01

241 **Table S1.** Statistic metrics assessing the agreement of the global CO<sub>2</sub> mole fraction (CO<sub>2</sub>, ppm) and its G<sub>ATM</sub>  
 242 (ppm yr<sup>-1</sup>) from GAW (WDCGG) and GAW (WDCGG+) during common period 1984-2020. GAW  
 243 (WDCGG) is GAW observations (139 sites) analysed by using the WDCGG method without extrapolation.  
 244 GAW (WDCGG+) is GAW observations (139 sites) analysed by using the WDCGG method with  
 245 extrapolation. The statistical metrics include: Pearson Correlation Coefficient (r), which ranges from -1 to  
 246 1, Root Mean Squared Error (RMSE), Mean Absolute Error (MAE), and Mean Error (ME). The negative  
 247 values in ME means the GAW (WDCGG) has higher values, vice versa.

| <b>El Niño 1987-1988</b> |                                       |              |                                     |              |
|--------------------------|---------------------------------------|--------------|-------------------------------------|--------------|
|                          | Trough ( $G_{ATM}$ starts increasing) |              | Peak ( $G_{ATM}$ starts decreasing) |              |
| <b>Date</b>              | Decimal year                          | Days of year | Decimal year                        | Days of year |
| <b>CTE</b>               | 1985.791635                           | 289          | 1987.041665                         | 15           |
| <b>GAW</b>               | 1985.874965                           | 319          | 1986.958295                         | 350          |
| <b>NOAA</b>              | 1985.874965                           | 319          | 1987.124995                         | 46           |
| <b>El Niño 1997-1998</b> |                                       |              |                                     |              |
| <b>CTE</b>               | 1996.208325                           | 76           | 1997.624975                         | 228          |
| <b>GAW</b>               | 1996.291655                           | 106          | 1997.624975                         | 228          |
| <b>NOAA</b>              | 1996.374985                           | 137          | 1997.708305                         | 259          |
| <b>El Niño 2014-2016</b> |                                       |              |                                     |              |
| <b>CTE</b>               | 2013.458315                           | 167          | 2015.208325                         | 76           |
| <b>GAW</b>               | 2013.374985                           | 137          | 2015.374985                         | 137          |
| <b>NOAA</b>              | 2013.541645                           | 198          | 2015.374985                         | 137          |

248 **Table S2.** displays the estimates of CO<sub>2</sub> growth rate increase/decrease for the three strong El Niño events (i.e 1987-  
249 1988, 1997-1998 and 2014-2016). These estimates are calculated from the smoothed trend of CO<sub>2</sub> growth rate based on  
250 CTE, GAW and NOAA networks (Fig. S9).

251

## 252 **References**

253 Schuldt, K., Mund, J., and Lujckx, I.: Multi-laboratory compilation of atmospheric carbon dioxide data for the  
254 period 1957–2021; obspack\_co2\_1\_GLOBALVIEWplus\_v8. 0\_2022-08-27, NOAA Global Monitoring  
255 Laboratory, <http://doi.org/10.25925/20220808>, 2022.

256 Tans, P. P., Thoning, K. W., Elliott, W. P., and Conway, T. J.: Error estimates of background atmospheric CO<sub>2</sub>  
257 patterns from weekly flask samples, *J. Geophys. Res. Atmos.*, 95, 14063-14070,  
258 <https://doi.org/10.1029/JD095iD09p14063>, 1990.

259 Tsutsumi, Y., Mori, K., Hirahara, T., Ikegami, M., and Conway, T. J.: Technical Report of Global Analysis  
260 Method for Major Greenhouse Gases by the World Data Center for Greenhouse Gases (WMO/TD-No. 1473).  
261 GAW Report No. 184. Geneva, WMO., 1-23, [https://library.wmo.int/index.php?lvl=notice\\_display&id=12631](https://library.wmo.int/index.php?lvl=notice_display&id=12631),  
262 2009.

263
